# Supplementary material for: A Comprehensive Bioinformatic Analysis of RNA-seq Datasets Reveals a Differential and Variable Expression of Wildtype and Variant UGT1A Transcripts in Human Tissues and Their Deregulation in Cancers
Source: MDPI journal article supplement (doi:10.3390/cancers16020353), 2024-01-13
Supplement: s1 [file s1]

# A Comprehensive Bioinformatic Analysis of RNA-seq Datasets Reveals Differential and Variable Expression of Wildtype and Variant UGT1A Transcripts in Human Tissues and Their Deregulation in Cancers

Dong Gui Hu\*, Shashikanth Marri, Julie-Ann Hulin, Ross A McKinnon, Peter I Mackenzie, Robyn Meech

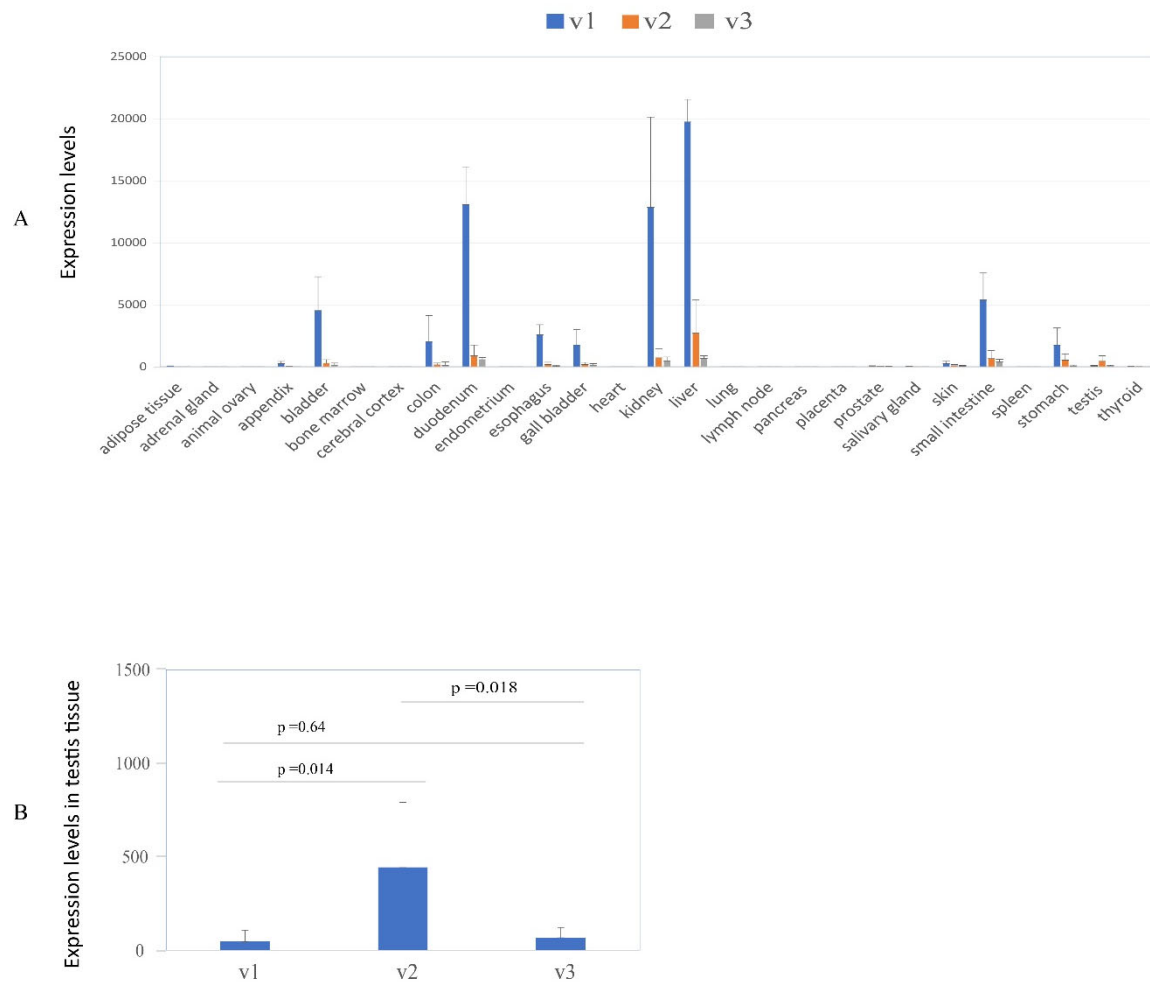

**Figure S1. Expression profiles of UGT1A transcripts in normal human tissues.** The RNA-seq dataset of the Human Protein Atlas (HPA) was downloaded the NCBI database and the sequence reads of UGT1A transcripts were obtained using the SRA toolkit. Shown are the expression levels of UGT1A\_v1, \_v2, and \_v3 transcripts in 27 different human tissues as indicated (A) and the expression levels of these transcripts in testis were highlighted (B).

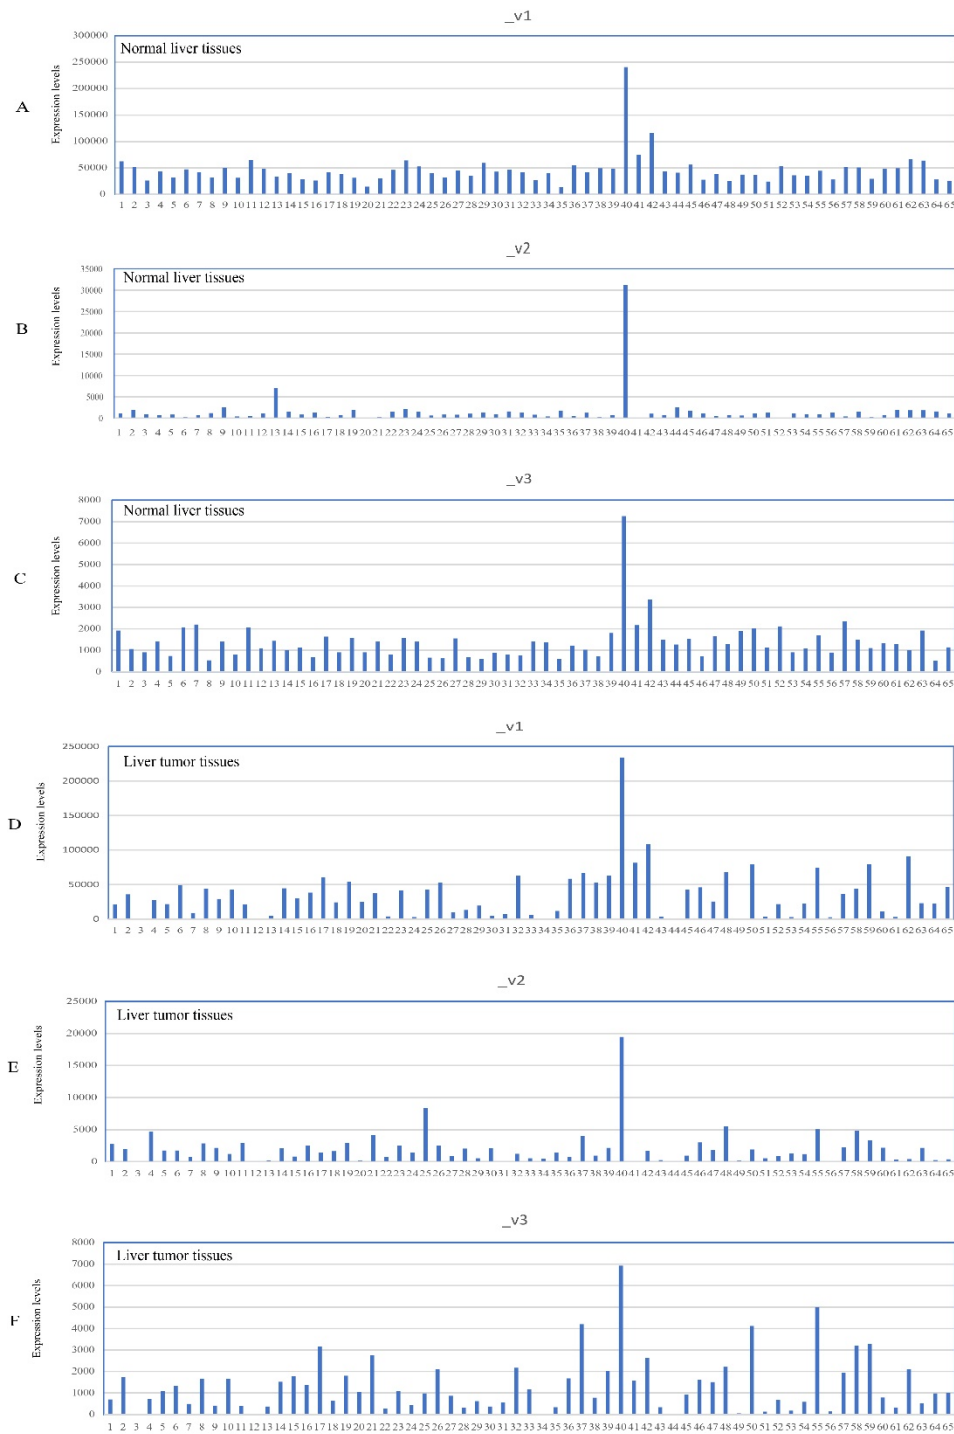

**Figure S2. Expression profiles of UGT1A transcripts in HCC (hepatocellular carcinoma) tumor and matched adjacent normal liver tissues.** The RNA-seq dataset of 65 paired HCC tumor and adjacent normal liver tissues was downloaded the NCBI database and the sequence reads of UGT1A transcripts (\_v1, \_v2, \_v3) were obtained using the SRA toolkit. Shown are the expression levels of UGT1A\_v1, \_v2, and \_v3 transcripts in normal liver tissues (A-C) and HCC tumors (D-F).

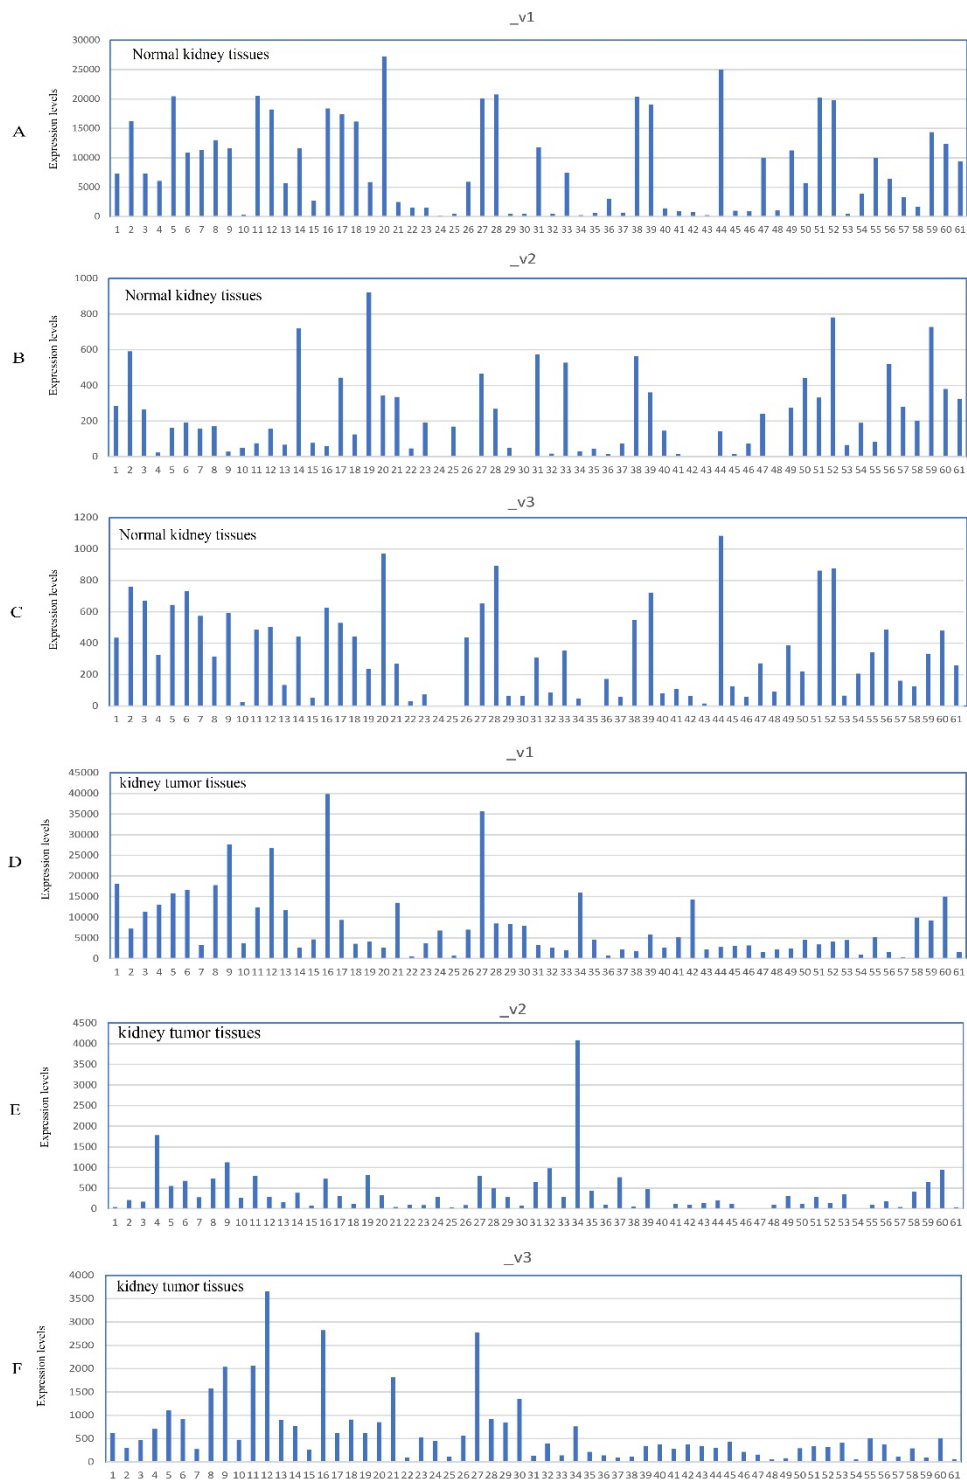

**Figure S3. Expression profiles of UGT1A transcripts in RCC (renal cell carcinoma) tumor and matched adjacent normal kidney tissues.** The RNA-seq dataset of 61 paired RCC tumor and adjacent normal kidney tissues was downloaded from the NCBI database and the sequence reads of UGT1A transcripts (*\_v1*, *\_v2*, *\_v3*) were obtained using the SRA toolkit. Shown are the expression levels of UGT1A\_ *\_v1*, *\_v2*, and *\_v3* transcripts in normal kidney tissues (A-C) and RCC tumors (D-F).

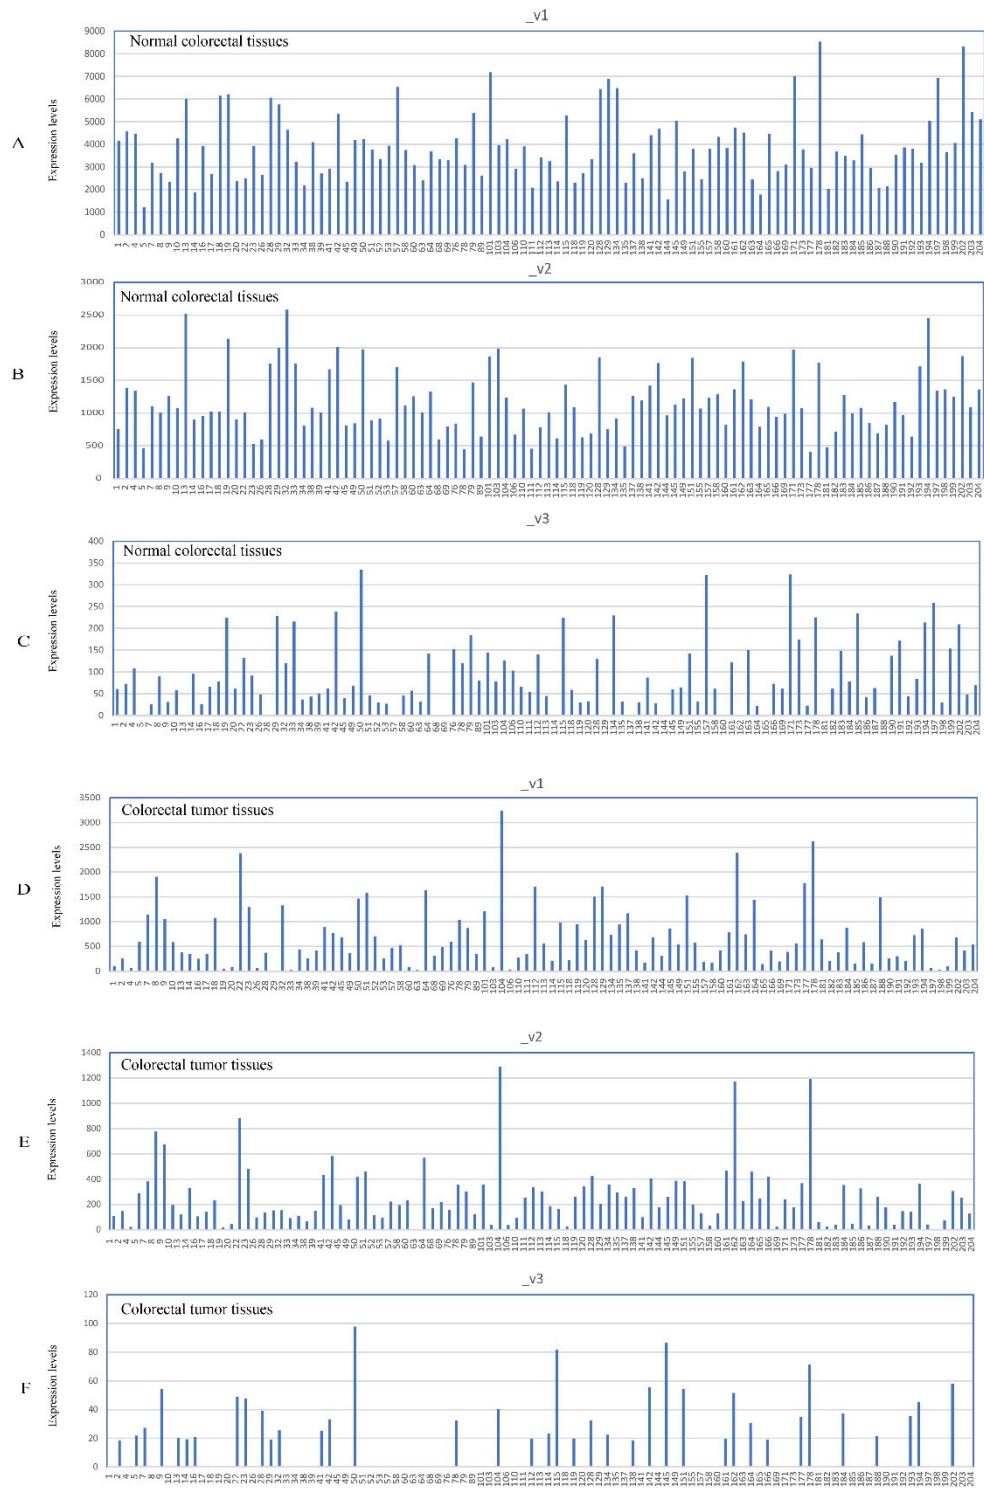

**Figure S4. Expression profiles of UGT1A transcripts in CRC (colorectal carcinoma) tumor and matched adjacent normal colorectal tissues.** The RNA-seq dataset of 103 paired CRC tumor and adjacent normal colorectal tissues was downloaded the NCBI database and the sequence reads of UGT1A transcripts (*\_v1*, *\_v2*, *\_v3*) were obtained using the SRA toolkit. Shown are the expression levels of UGT1A\_ *\_v1*, *\_v2*, and *\_v3* transcripts in normal liver tissues (A-C) and RCC tumors (D-F).

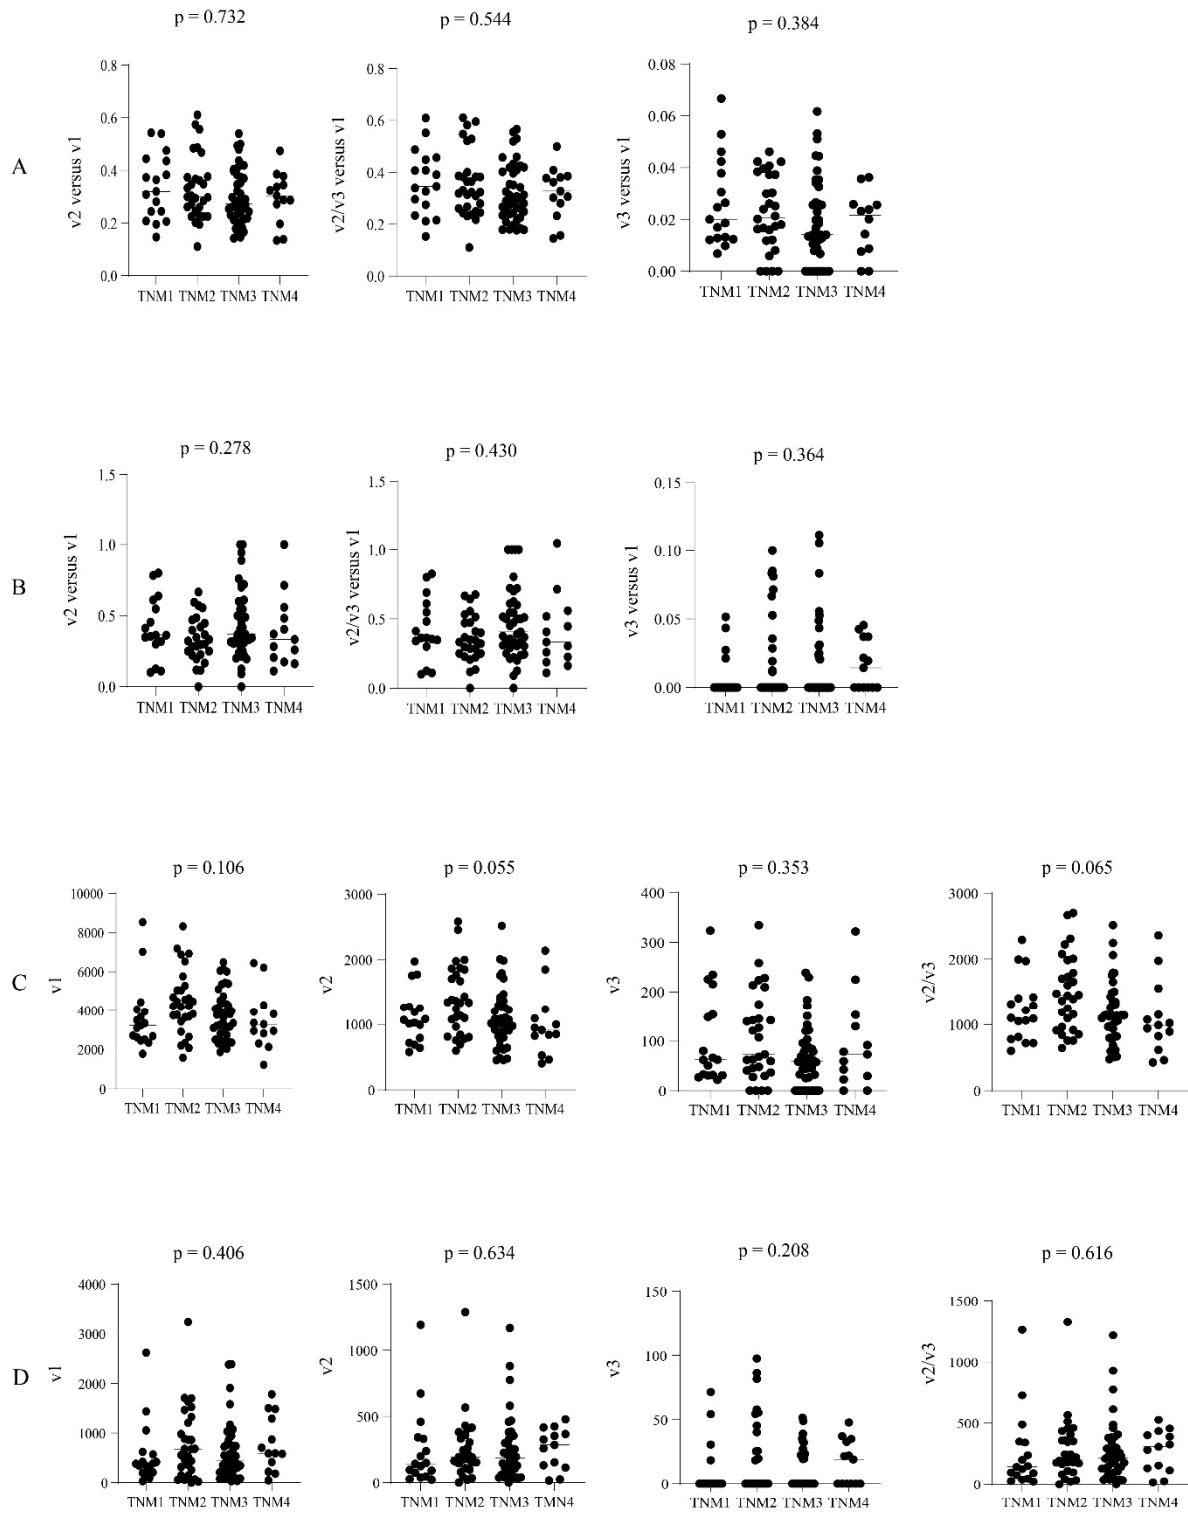

**Figure S5. Assessment of the difference in the expression levels of variants or the variant/canonical transcript expression ratios across different tumor stages.** The expression levels of UGT1A transcripts (v1, v2, v3) of 103 paired colorectal cancer and adjacent normal tissues and the tumor stages of all 103 colorectal patients were obtained from the SRA database. The potential difference in 1) the expression ratios (v2 versus v1, v2/v3 versus v1, v3 versus v1) across tumor stages (TNM1-4) in normal (A) and tumor (B) tissues, and 2) the expression levels of variants (v1, v2, v2/v3, v3) across tumor stages in normal (C) and tumor (D) tissues were assessed using ANOVA analysis (Kruskal-Wallis Test). A p value of < 0.05 is considered as statistically significant.

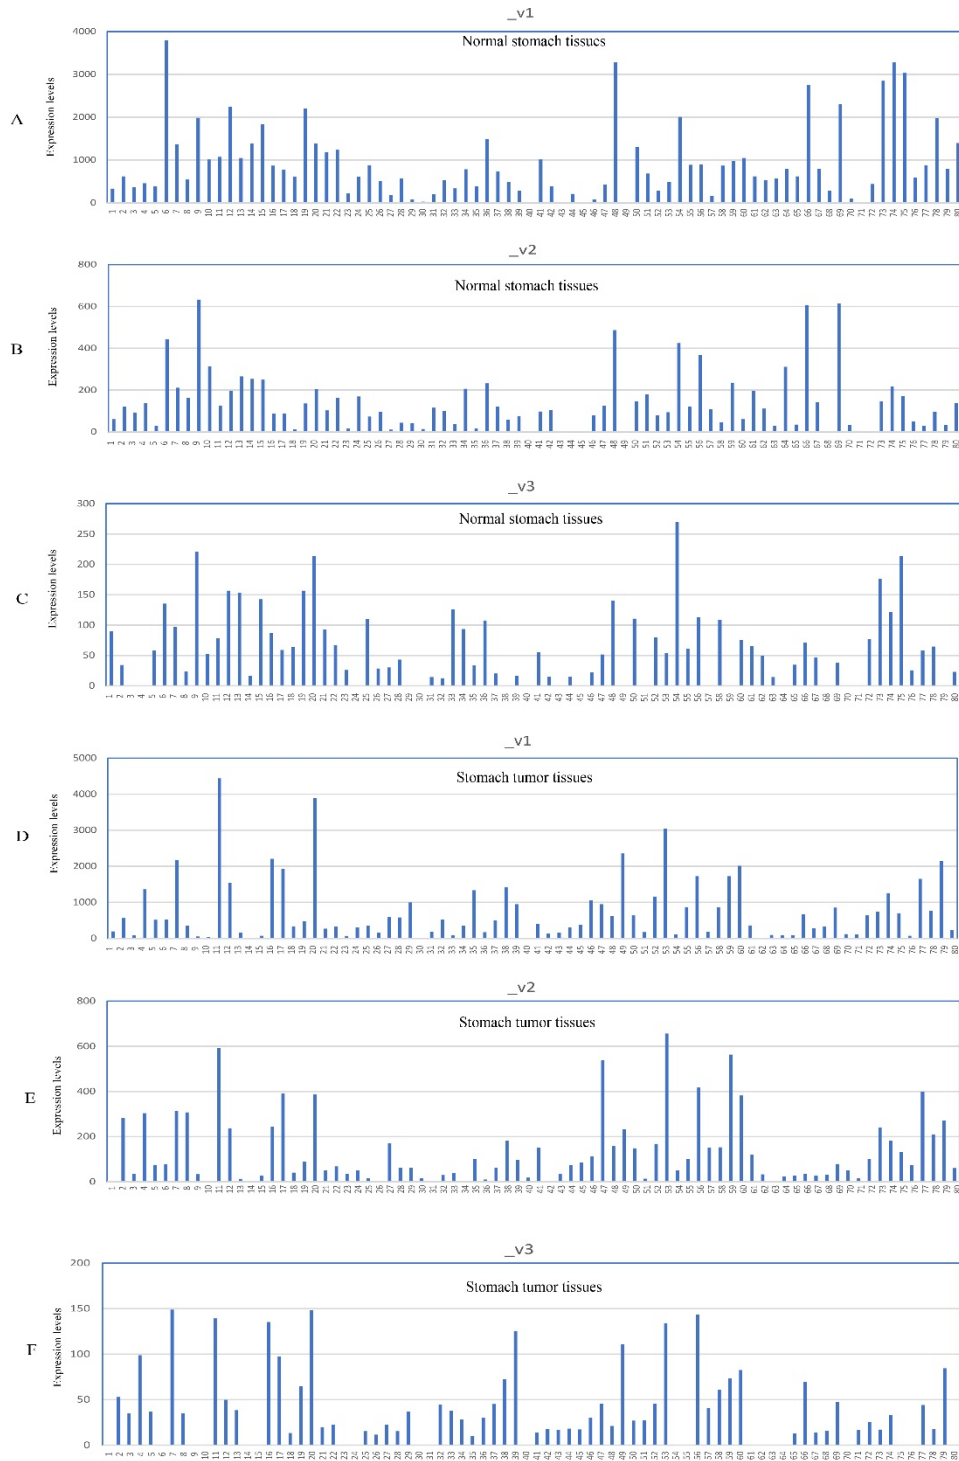

**Figure S6. Expression profiles of UGT1A transcripts in stomach cancer and matched adjacent normal stomach tissues.** The RNA-seq dataset of 80 paired stomach cancer and adjacent normal stomach tissues was downloaded the NCBI database and the sequence reads of UGT1A transcripts (\_v1, \_v2, \_v3) were obtained using the SRA toolkit. Shown are the expression levels of UGT1A\_v1, \_v2, and \_v3 transcripts in normal liver tissues (A-C) and RCC tumors (D-F).

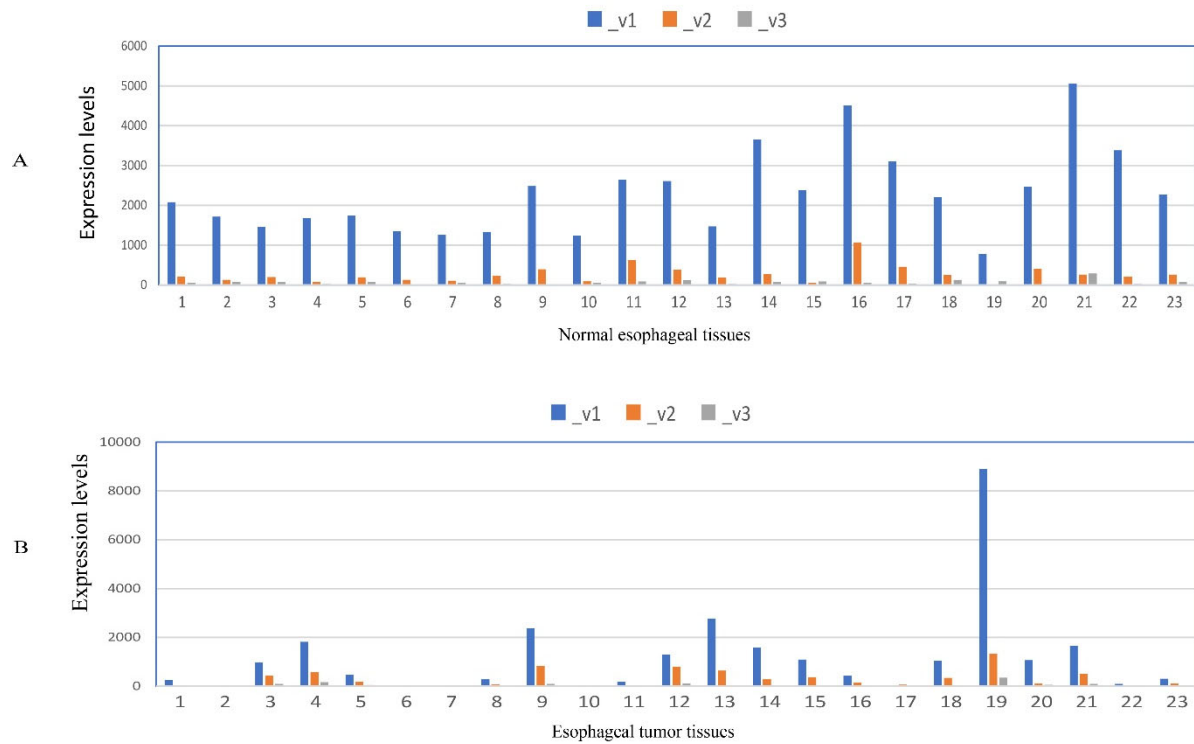

**Figure S7. Expression profiles of UGT1A transcripts in esophagus cancer and matched adjacent normal esophagus tissues.** The RNA-seq dataset of 23 paired esophagus cancer and adjacent normal esophagus tissues was downloaded from the NCBI database and the sequence reads of UGT1A transcripts (\_v1, \_v2, \_v3) were obtained using the SRA toolkit. Shown are the expression levels of UGT1A\_v1, \_v2, and \_v3 transcripts in normal (A) and tumor (B) esophagus tissues.

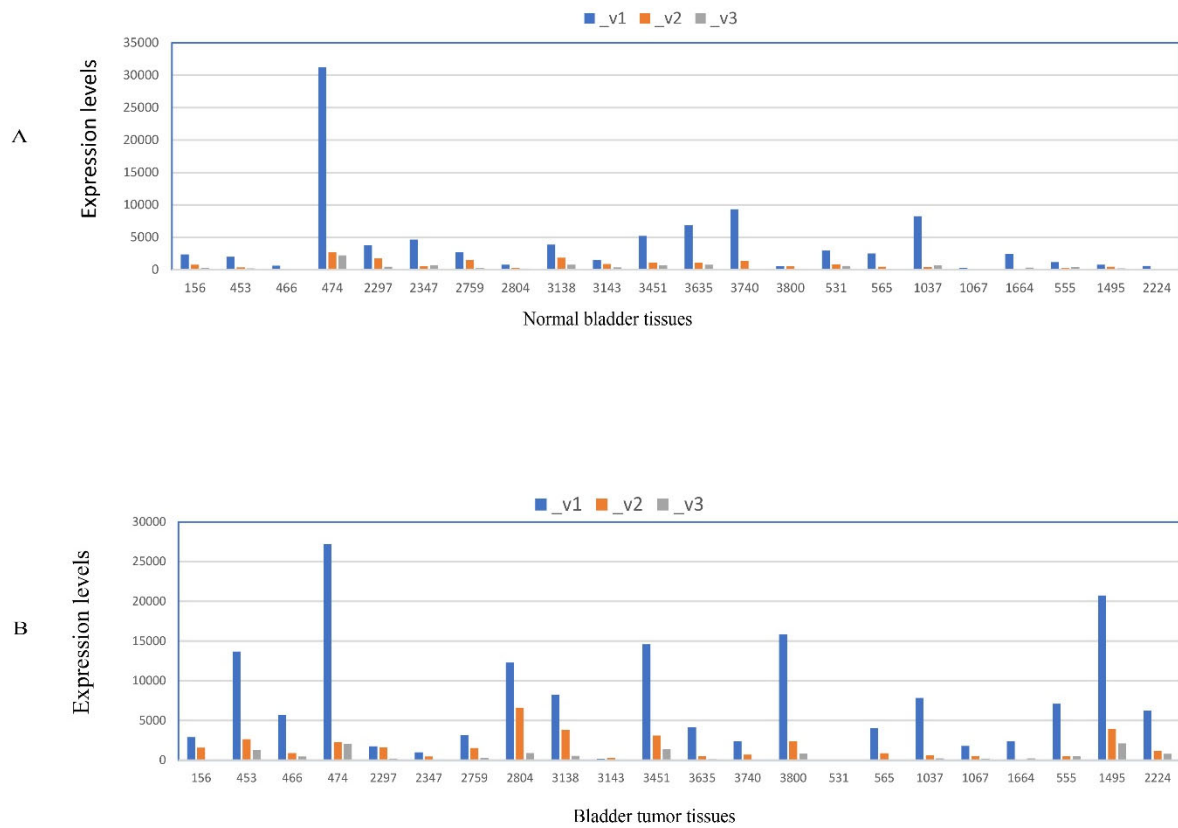

**Figure S8. Expression profiles of UGT1A transcripts in bladder cancer and matched adjacent normal bladder tissues.** The RNA-seq dataset of 22 paired bladder cancer and adjacent normal bladder tissues was downloaded the NCBI database and the sequence reads of UGT1A transcripts (\_v1, \_v2, \_v3) were obtained using the SRA toolkit. Shown are the expression levels of UGT1A\_v1, \_v2, and \_v3 transcripts in normal (A) and tumor (B) bladder tissues.

No. of sequence reads

Splice Junctions

|    |       | v3down1 |                                                                                         | E5a                                                                                  |  |
|----|-------|---------|-----------------------------------------------------------------------------------------|--------------------------------------------------------------------------------------|--|
| 1  | ----- | -----   | -----GATGACTGACTTCCACACCTTTGAGGTGCTAAT                                                  | TTACAAGGAGAACATCATGCGCCTCTCCAGCCTTCACAAGGACCGCCCGGTGGAGCCGCTGGACCTGG                 |  |
| 15 | ----- | -----   | -----TGATGACTGACTTCCACACCTTTGAGGTGCTAAT                                                 | TTACAAGGAGAACATCATGCGCCTCTCCAGCCTTCACAAGGACCGCCCGGTGGAGCCGCTGGACCTG                  |  |
| 2  | ----- | -----   | -----GACTGATGACTTCCACACCTTTGAGGTGCTAAT                                                  | TTACAAGGAGAACATCATGCGCCTCTCCAGCCTTCACAAGGACCGCCCGGTGGAGCCGCTGGAC                     |  |
| 1  | ----- | -----   | -----CAGGGGAGGACTGATGACTGACTTCCACACCTTTGAGGTGCTAAT                                      | TTACAAGGAGAACATCATGCGCCTCTCCAGCCTTCACAAGGACCGCCCGGTGGAGC                             |  |
| 1  | ----- | -----   | -----CAANAGGGGAGGACTGATGACTGACTTCCACACCTTTGAGGTGCTAAT                                   | TTACAAGGAGAACATCATGCGCCTCTCCAGCCTTCACAAGGACCGCCCGGTGG                                |  |
| 2  | ----- | -----   | -----CAGGGGACACAGGGGAGGACTGATGACTGACTTCCACACCTTTGAGGTGCTAAT                             | TTACAAGGAGAACATCATGCGCCTCTCCAGCCTTCACAAGGACCGCCCG                                    |  |
| 11 | ----- | -----   | -----GGGNCACACAGCTTGAGCAAGGGACACAGGGGAGGACTGATGACTGACTTCCACACCTTTGAGGTGCTAAT            | TTACAAGGAGAACATCATGCGCCTCTCC                                                         |  |
| 9  | ----- | -----   | -----CACGGGGACACACAGCTTGAGCAAGGGACACAGGGGAGGACTGATGACTGACTTCCACACCTTTGAGGTGCTAAT        | TTACAAGGAGAACATCATGCGCCT                                                             |  |
| 1  | ----- | -----   | -----CGGAACACGGGGACACACAGCTTGAGCAAGGGACACAGGGGAGGACTGATGACTGACTTCCACACCTTTGAGGTGCTAAT   | TTACAAGGAGAACATCATG                                                                  |  |
|    |       |         |                                                                                         |                                                                                      |  |
|    |       | v3down2 |                                                                                         | E5a                                                                                  |  |
| 17 | ----- | -----   | -----TGATGACTGACTTCCACACCTTTGAGGTGCTAATGT                                               | TTACAAGGAGAACATCATGCGCCTCTCCAGCCTTCACAAGGACCGCCCGGTGGAGCCGCTGGAC                     |  |
| 9  | ----- | -----   | -----GACTGATGACTTCCACACCTTTGAGGTGCTAATGT                                                | TTACAAGGAGAACATCATGCGCCTCTCCAGCCTTCACAAGGACCGCCCGGTGGAGCCGCTG                        |  |
|    |       |         |                                                                                         |                                                                                      |  |
|    |       | E2      |                                                                                         | E5a                                                                                  |  |
| 1  | ----- | -----   | -----GAAAGCTATGGCAATTGCTGATGCTTTGGGCAAAATCCCTCAGACA                                     | TTACAAGGAGAACATCATGCGCCTCTCCAGCCTTCACAAGGACCGCCAGATCGG                               |  |
| 1  | ----- | -----   | -----CTCAGAAATCCAGAGAGAAAGCTATGGCAATTGCTGATGCTTTGGGCAAAATCCCTCAGACA                     | TTACAAGGAGAACATCATGCGCCTCTCCAGCCTTC                                                  |  |
|    |       |         |                                                                                         |                                                                                      |  |
|    |       | E4      |                                                                                         | v2/v3up                                                                              |  |
| 1  | ----- | -----   | -----ATCAATGACAAAAG                                                                     | GTACCTCCTCTTAGAAGAAGCAGCAGTCAGGAAGACAGATCGGAAGAGCGCTCGTGTAGGGAAGAGTGTAGATCTCGGTGCTCG |  |
| 1  | ----- | -----   | -----TGCTCTAAAAGCAGTCATCAATGACAAAAG                                                     | GTACCTCCTCTTAGAAGAAGCAGCAGTCAGGAAGACACATGTGAAGAGCTGGAGCATGTTGAGATGAGA                |  |
| 2  | ----- | -----   | -----AGAAAATGCTCTAAAAGCAGTCATCAATGACAAAAG                                               | GTACCTCCTCTTAGAAGAAGCAGCAGTCAGGAAGACAGATGTGAAGAGCTGGAGAGATCGGAA                      |  |
| 1  | ----- | -----   | -----CTTCTGAAGATTTAGAAAATGCTCTAAAAGCAGTCATCAATGACAAAAG                                  | GTACCTCCTCTTAGAAGAAGCAGCAGTCAGGAAGACAGATGTGAGTGC                                     |  |
| 8  | ----- | -----   | -----CTGGAATGACTTCTGAAGATTTAGAAAATGCTCTAAAAGCAGTCATCAATGACAAAAG                         | GTACCTCCTCTTAGAAGAAGCAGCAGTCAGGAAGACAGAT                                             |  |
| 1  | ----- | -----   | -----CCTGAATGTTCTGGAATGACTTCTGAAGATTTAGAAAATGCTCTAAAAGCAGTCATCAATGACAAAAG               | GTACCTCCTCTTAGAAGAAGCAGTCAG                                                          |  |
| 4  | ----- | -----   | -----AGTGACCTGAAATGTTCTGGAATGACTTCTGAAGATTTAGAAAATGCTCTAAAAGCAGTCATCAATGACAAAAG         | GTACCTCCTCTTAGAAGAAGCAG                                                              |  |
| 3  | ----- | -----   | -----GGAGTGACCTGAAATGTTCTGGAATGACTTCTGAAGATTTAGAAAATGCTCTAAAAGCAGTCATCAATGACAAAAG       | GTACCTCCTCTTAGAAGAAGCA                                                               |  |
| 4  | ----- | -----   | -----GGGAGGAGCTGATGACTGACTTCCACACCTTTGAGTTACAGGAGAACATCATGCGCCTTAAGCAGTCATCAATGACAAAAG  | GTACCTCCTCTTAGAAGAAG                                                                 |  |
|    |       |         |                                                                                         |                                                                                      |  |
|    |       | E4      |                                                                                         | vE5a1                                                                                |  |
| 2  | ----- | -----   | -----GAAATGACTTCTGAAGATTTAGAAAATGCTCTAAAAGCAGTCATCAATGACAAAAG                           | GAGAACATCATGCGCCTCTCCAGCCTTCACAAGGACCGCCCGGT                                         |  |
| 3  | ----- | -----   | -----GGAATGACTTCTGAAGATTTAGAAAATGCTCTAAAAGCAGTCATCAATGACAAAAG                           | GAGAACATCATGCGCCTCTCCAGCCTTCACAAGGACCGCCCGG                                          |  |
| 2  | ----- | -----   | -----CTGGAATGACTTCTGAAGATTTAGAAAATGCTCTAAAAGCAGTCATCAATGACAAAAG                         | GAGAACATCATGCGCCTCTCCAGCCTTCACAAGGACCGCCCG                                           |  |
| 3  | ----- | -----   | -----GACCCTGAATGTTCTGGAATGACTTCTGAAGATTTAGAAAATGCTCTAAAAGCAGTCATCAATGACAAAAG            | GAGAACATCATGCGCCTCTCCAGCCTTC                                                         |  |
| 11 | ----- | -----   | -----GGGAGCTGAGTGACCTGAAATGTTCTGGAATGACTTCTGAAGATTTAGAAAATGCTCTAAAAGCAGTCATCAATGACAAAAG | GAGAACATCATGCGC                                                                      |  |
|    |       |         |                                                                                         |                                                                                      |  |
|    |       | E4      |                                                                                         | vE5a2                                                                                |  |
| 1  | ----- | -----   | -----CCTGAATGTTCTGGAATGACTTCTGAAGATTTAGAAAATGCTCTAAAAGCAGTCATCAATGACAAAAG               | TGCGCCTCTCCAGCCTTCACAAGGACCGCCCG                                                     |  |
| 21 | ----- | -----   | -----CCTGAATGTTCTGGAATGACTTCTGAAGATTTAGAAAATGCTCTAAAAGCAGTCATCAATGACAAAAG               | TGCGCCTCTCCAGCCTTCACAAGGACCGCCCG                                                     |  |
|    |       |         |                                                                                         |                                                                                      |  |
|    |       | E4      |                                                                                         | vE5a3                                                                                |  |
| 1  | ----- | -----   | -----GTGACCTGAAATGTTCTGGAATGACTTCTGAAGATTTAGAAAATGCTCTAAAAGCAGTCATCAATGACAAAAG          | CCTTCACAAGGACCGCCCGGTGGAGC                                                           |  |
| 1  | ----- | -----   | -----CTGAGTGACCTGAAATGTTCTGGAATGACTTCTGAAGATTTAGAAAATGCTCTAAAAGCAGTCATCAATGACAAAAG      | CCTTCACAAGGACCGCCCGGT                                                                |  |
|    |       |         |                                                                                         |                                                                                      |  |
|    |       | E4      |                                                                                         | vE5c                                                                                 |  |
| 1  | ----- | -----   | -----CTGAATGTTCTGGAATGACTTCTGAAGATTTAGAAAATGCTCTAAAAGCAGTCATCAATGACAAAAG                | AGCTTGAGGAAGAGATGACTGAAGCCATTAC                                                      |  |
|    |       |         |                                                                                         |                                                                                      |  |
|    |       | E4      |                                                                                         | vE5d                                                                                 |  |
| 3  | ----- | -----   | -----CTGGAATGACTTCTGAAGATTTAGAAAATGCTCTAAAAGCAGTCATCAATGACAAAAG                         | GTACCTTTCAACAAGTCTGAACTCTGGACATCATTGAC                                               |  |

**Figure S9. Sequence reads containing specific splice junctions of novel UGT1A transcripts.** The UGT-captureSeq data (SRP073607) was downloaded from the NCBI database and the sequence reads containing specific splice junctions of novel UGT1A transcripts were obtained using the SRA toolkit. Shown are the sequence reads containing specific splice junctions of nine different novel UGT1A transcripts (as indicated) that were identified from UGT-CaptureSeq samples.



Table S13. UGT1A transcripts and proteins

| Transcripts | Predicted Exon structure | Proteins    | Lengths<br>(aa) | C-terminal peptides encoded by wildtype and variant 3' terminal exons                                |
|-------------|--------------------------|-------------|-----------------|------------------------------------------------------------------------------------------------------|
|             |                          |             |                 | Predicted Amino acid sequences                                                                       |
| _v1         | E1/E2/E3/E4/E5a          | _i1         | 99              | SYKENIMRLS SLHKDRPVEPLDLAVFWVEFVMRHKGAPHLRPAAHDLTWYQYHSLDVGIFLLAVVLTVAFITFKCCAYGYRKCLGKKGRVKKAHKSKTH |
| _v2         | E1/E2/E3/E4/E5b          | _i2         | 10              | RKKQSQGRQM                                                                                           |
| _v3         | E1/E2/E3/E4/E5bw/E5a     | _i2         | 10              | RKKQSQGRQM                                                                                           |
| _v2/v3up    | E1/E2/E3/E4/EEv2/v3up    | _iv2/v3up   | 44              | RLPPLERSSSQEDRCCEELEHVQMRGDGTRGHTLSKGGQQGRDTD                                                        |
| _v2/v3down  | E1/E2/E3/E4/EEv2/v3down  | _iv2/v3down | 39              | RSSSQEDRCCEELEHVQMRGDGTRGHTLSKGGQQGRDTD                                                              |
| _vE5a1      | E1/E2/E3/E4/E5a1         | _iE5a1      | 28              | RRTSCASPAFTRTARWSRWTWPCSGWSL                                                                         |
| _vE5a2      | E1/E2/E3/E4/E5a2         | _iE5a2      | 67              | SAPLQPSQGGPPGGAAGPGRVLGGVCDEAQGRATPAPRSPRPHLVPVPFLGRDWFPLGRRADSLHHL                                  |
| _vE5a3      | E1/E2/E3/E4/E5a3         | _iE5a3      | 89              | SLHKDRPVEPLDLAVFWVEFVMRHKGAPHLRPAAHDLTWYQYHSLDVGIFLLAVVLTVAFITFKCCAYGYRKCLGKKGRVKKAHKSKTH            |
| _vE5c       | E1/E2/E3/E4/E5c          | _iE5c       | 2               | RA                                                                                                   |
| _vE5d       | E1/E2/E3/E4/E5d          | _iE5d       | 13              | RYLSTSRPESGHH                                                                                        |
| _vE2E5a     | E1/E2/E5a                | _iE2E5a     | 72              | LQGEHHAPLQPSQGGPPGGAAGPGRVLGGVCDEAQGRATPAPRSPRPHLVPVPFLGRDWFPLGRRADSLHHL                             |

Amino acid sequences highlighted in RED (\_i1, \_iE5a3), BLUE (\_iv2/v3up, \_v2/v3down), or GREEN (\_iE5a2, \_iE2E5a) are encoded by the same Open reading frame. E: exon; aa: amino acid
